# Supplementary material for: Epidemiological and Evolutionary Inference of the Transmission Network of the 2014 Highly Pathogenic Avian Influenza H5N2 Outbreak in British Columbia, Canada
Source: PubMed Central journal article supplement (PMC4973242; doi:10.1038/srep30858), 2016-08-04
Supplement: srep30858-s2.pdf [file srep30858-s2.pdf]

Supplementary Material

**Epidemiological and Evolutionary Inference of the Transmission Network of the 2014 Highly Pathogenic Avian Influenza H5N2 Outbreak in British Columbia, Canada**

Wanhong Xu<sup>1</sup>, Yohannes Berhane<sup>1</sup>, Caroline Dubé<sup>2</sup>, Binhua Liang<sup>3,5</sup>, John Pasick<sup>1\*</sup>, Gary VanDomselaar<sup>3,6</sup>, Soren Alexandersen<sup>1,4</sup>

**Figure S1.** MCC tree inferred for HA gene sequences of clade 2.3.4.4 H5 viruses collected between January 1, 2004 and July 10, 2015. The olive green coloured branches represent cluster I, the blue coloured branches represent cluster II, and the teal coloured branches represent cluster III. Nodes are indicated by the solid circles and sized by posterior probability.

**Figure S2.** MCC tree inferred for five concatenated Eurasian origin gene segments (PB2, PA, HA, M, and NS) of H5-clade 2.3.4.4 viruses collected between January 1, 2004 and July 10, 2015. Only H5N8 and H5N2 subtypes are included in the analyses. Nodes are indicated by the solid circles and sized by posterior probability.

**Figure S3.** ML tree of the HA gene sequences of clade 2.3.4.4 H5 viruses collected between January 1, 2004 and July 10, 2015. The numbers at nodes represent bootstrap values (>70%). Branch lengths are scaled according to the numbers of nucleotide substitutions per site.

**Figure S4.** ML tree of the five concatenated Eurasian origin gene segments (PB2, PA, HA, M, and NS) of the North American H5 clade 2.3.4.4 viruses containing H5N8 and H5N2 subtypes. The numbers at nodes represent bootstrap values (>70%). Branch lengths are scaled according to the numbers of nucleotide substitutions per site.

**Figure S5.** ML tree of the eight concatenated gene segments of the North American HPAI H5N2 viruses. The numbers at nodes represent bootstrap values (>70%). Branch lengths are scaled according to the numbers of nucleotide substitutions per site.

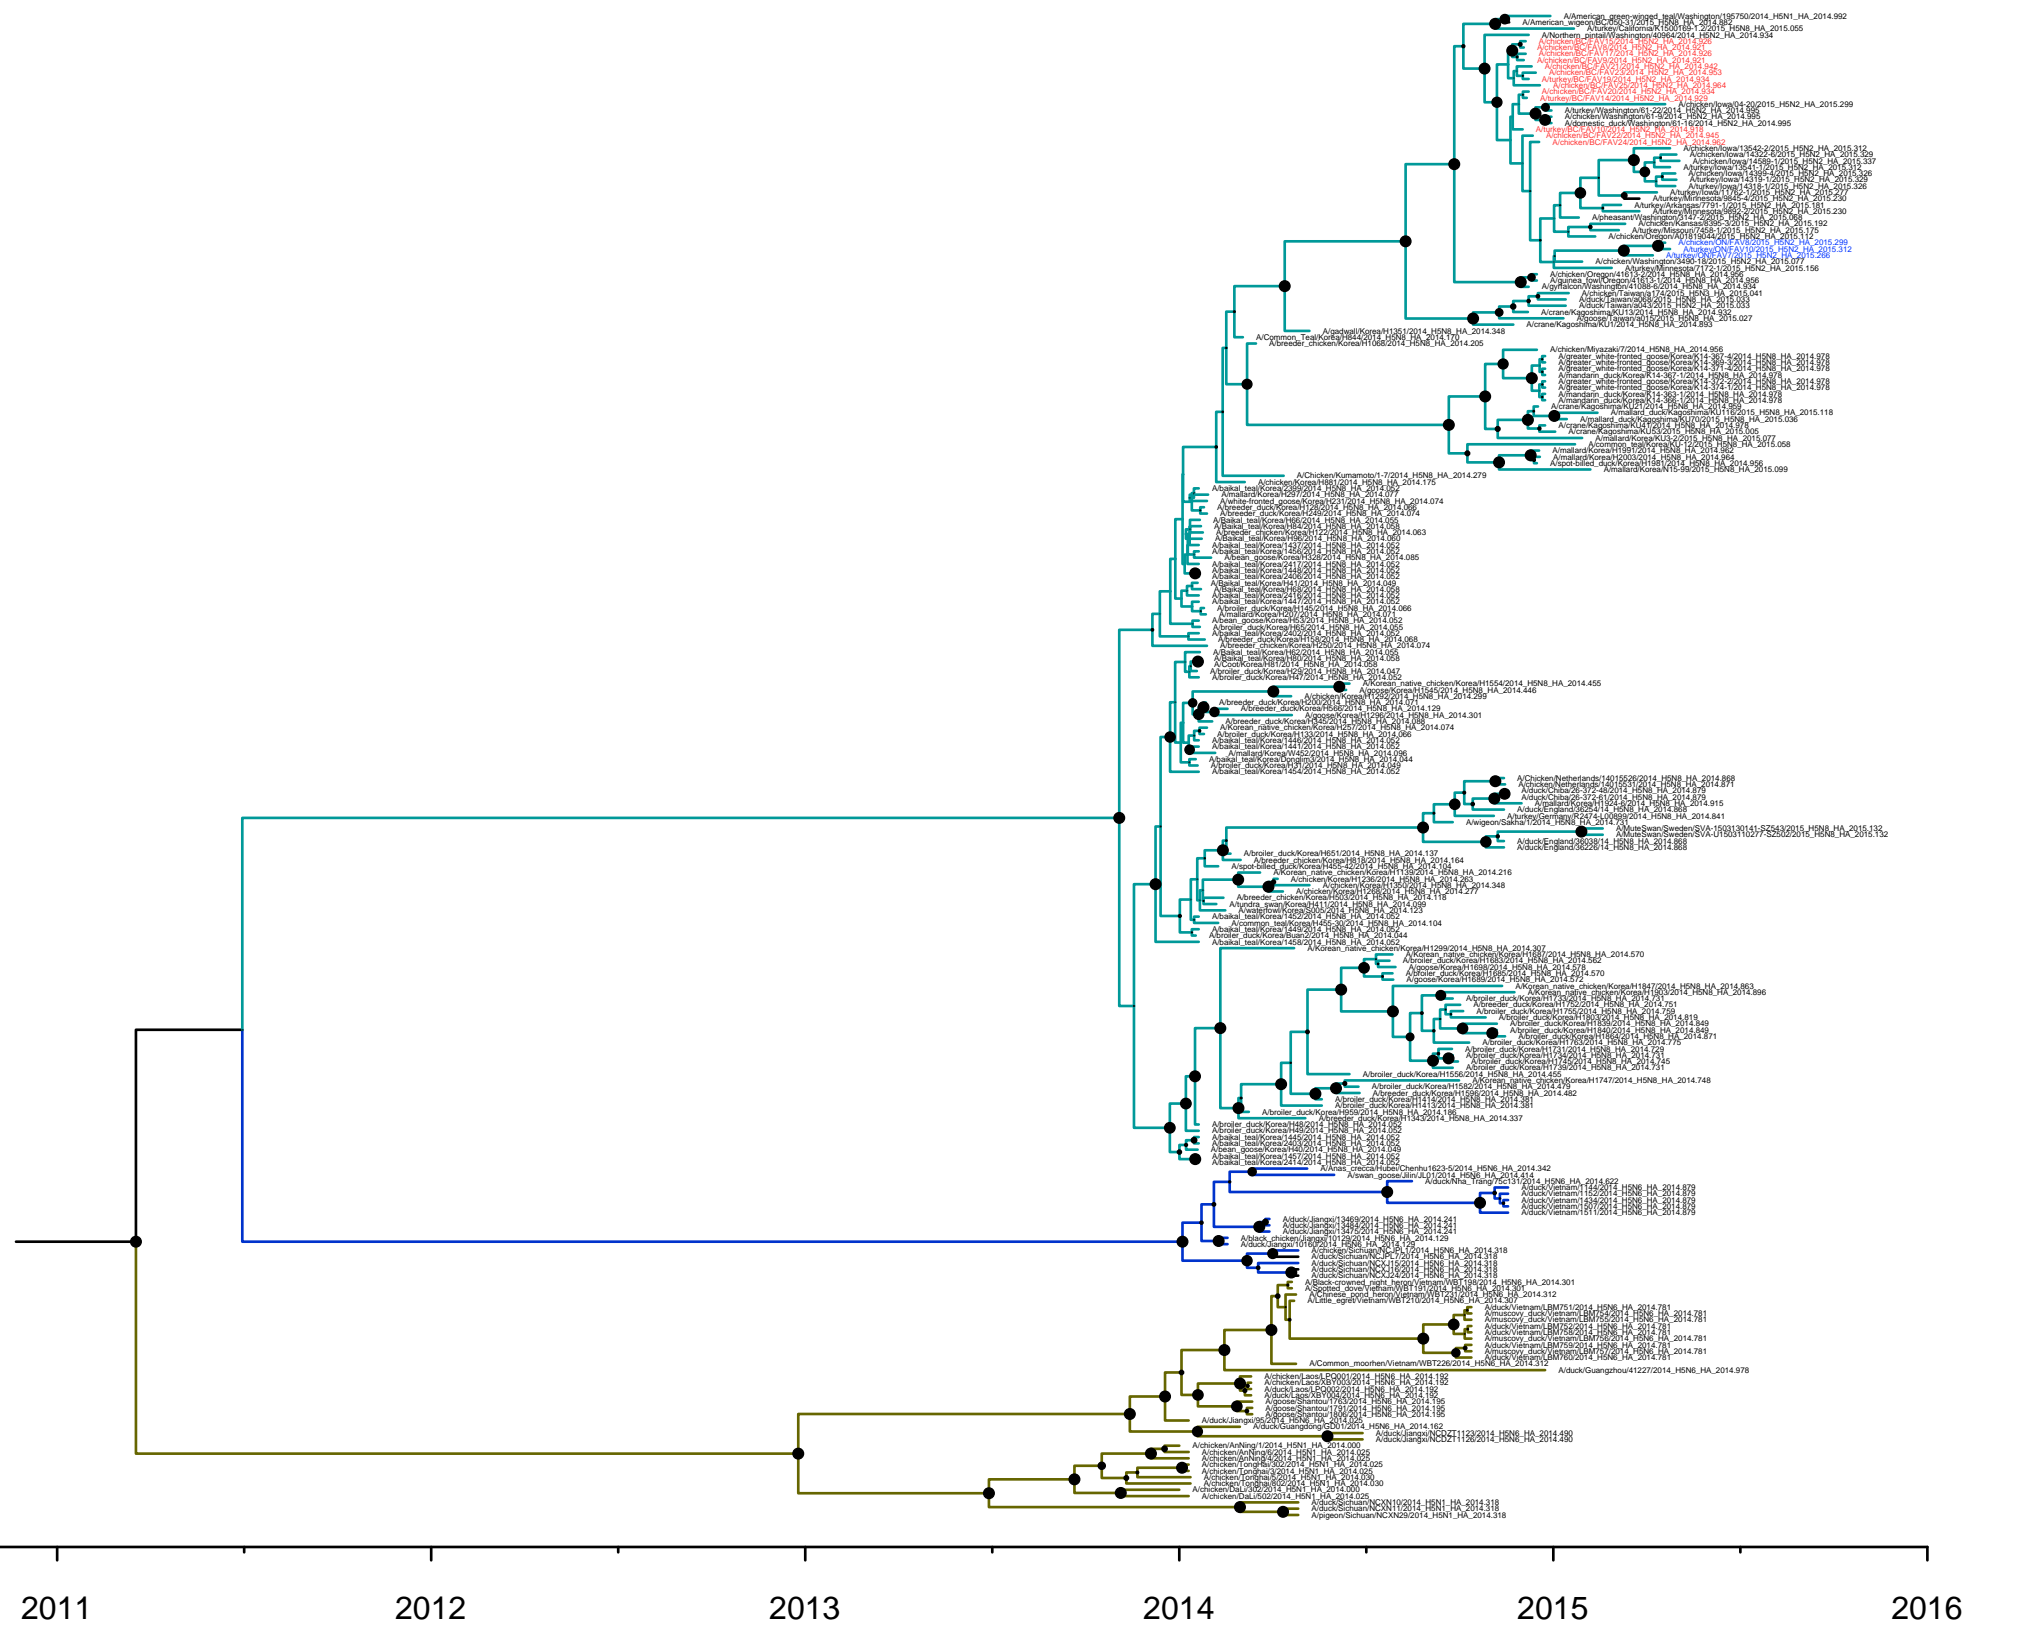

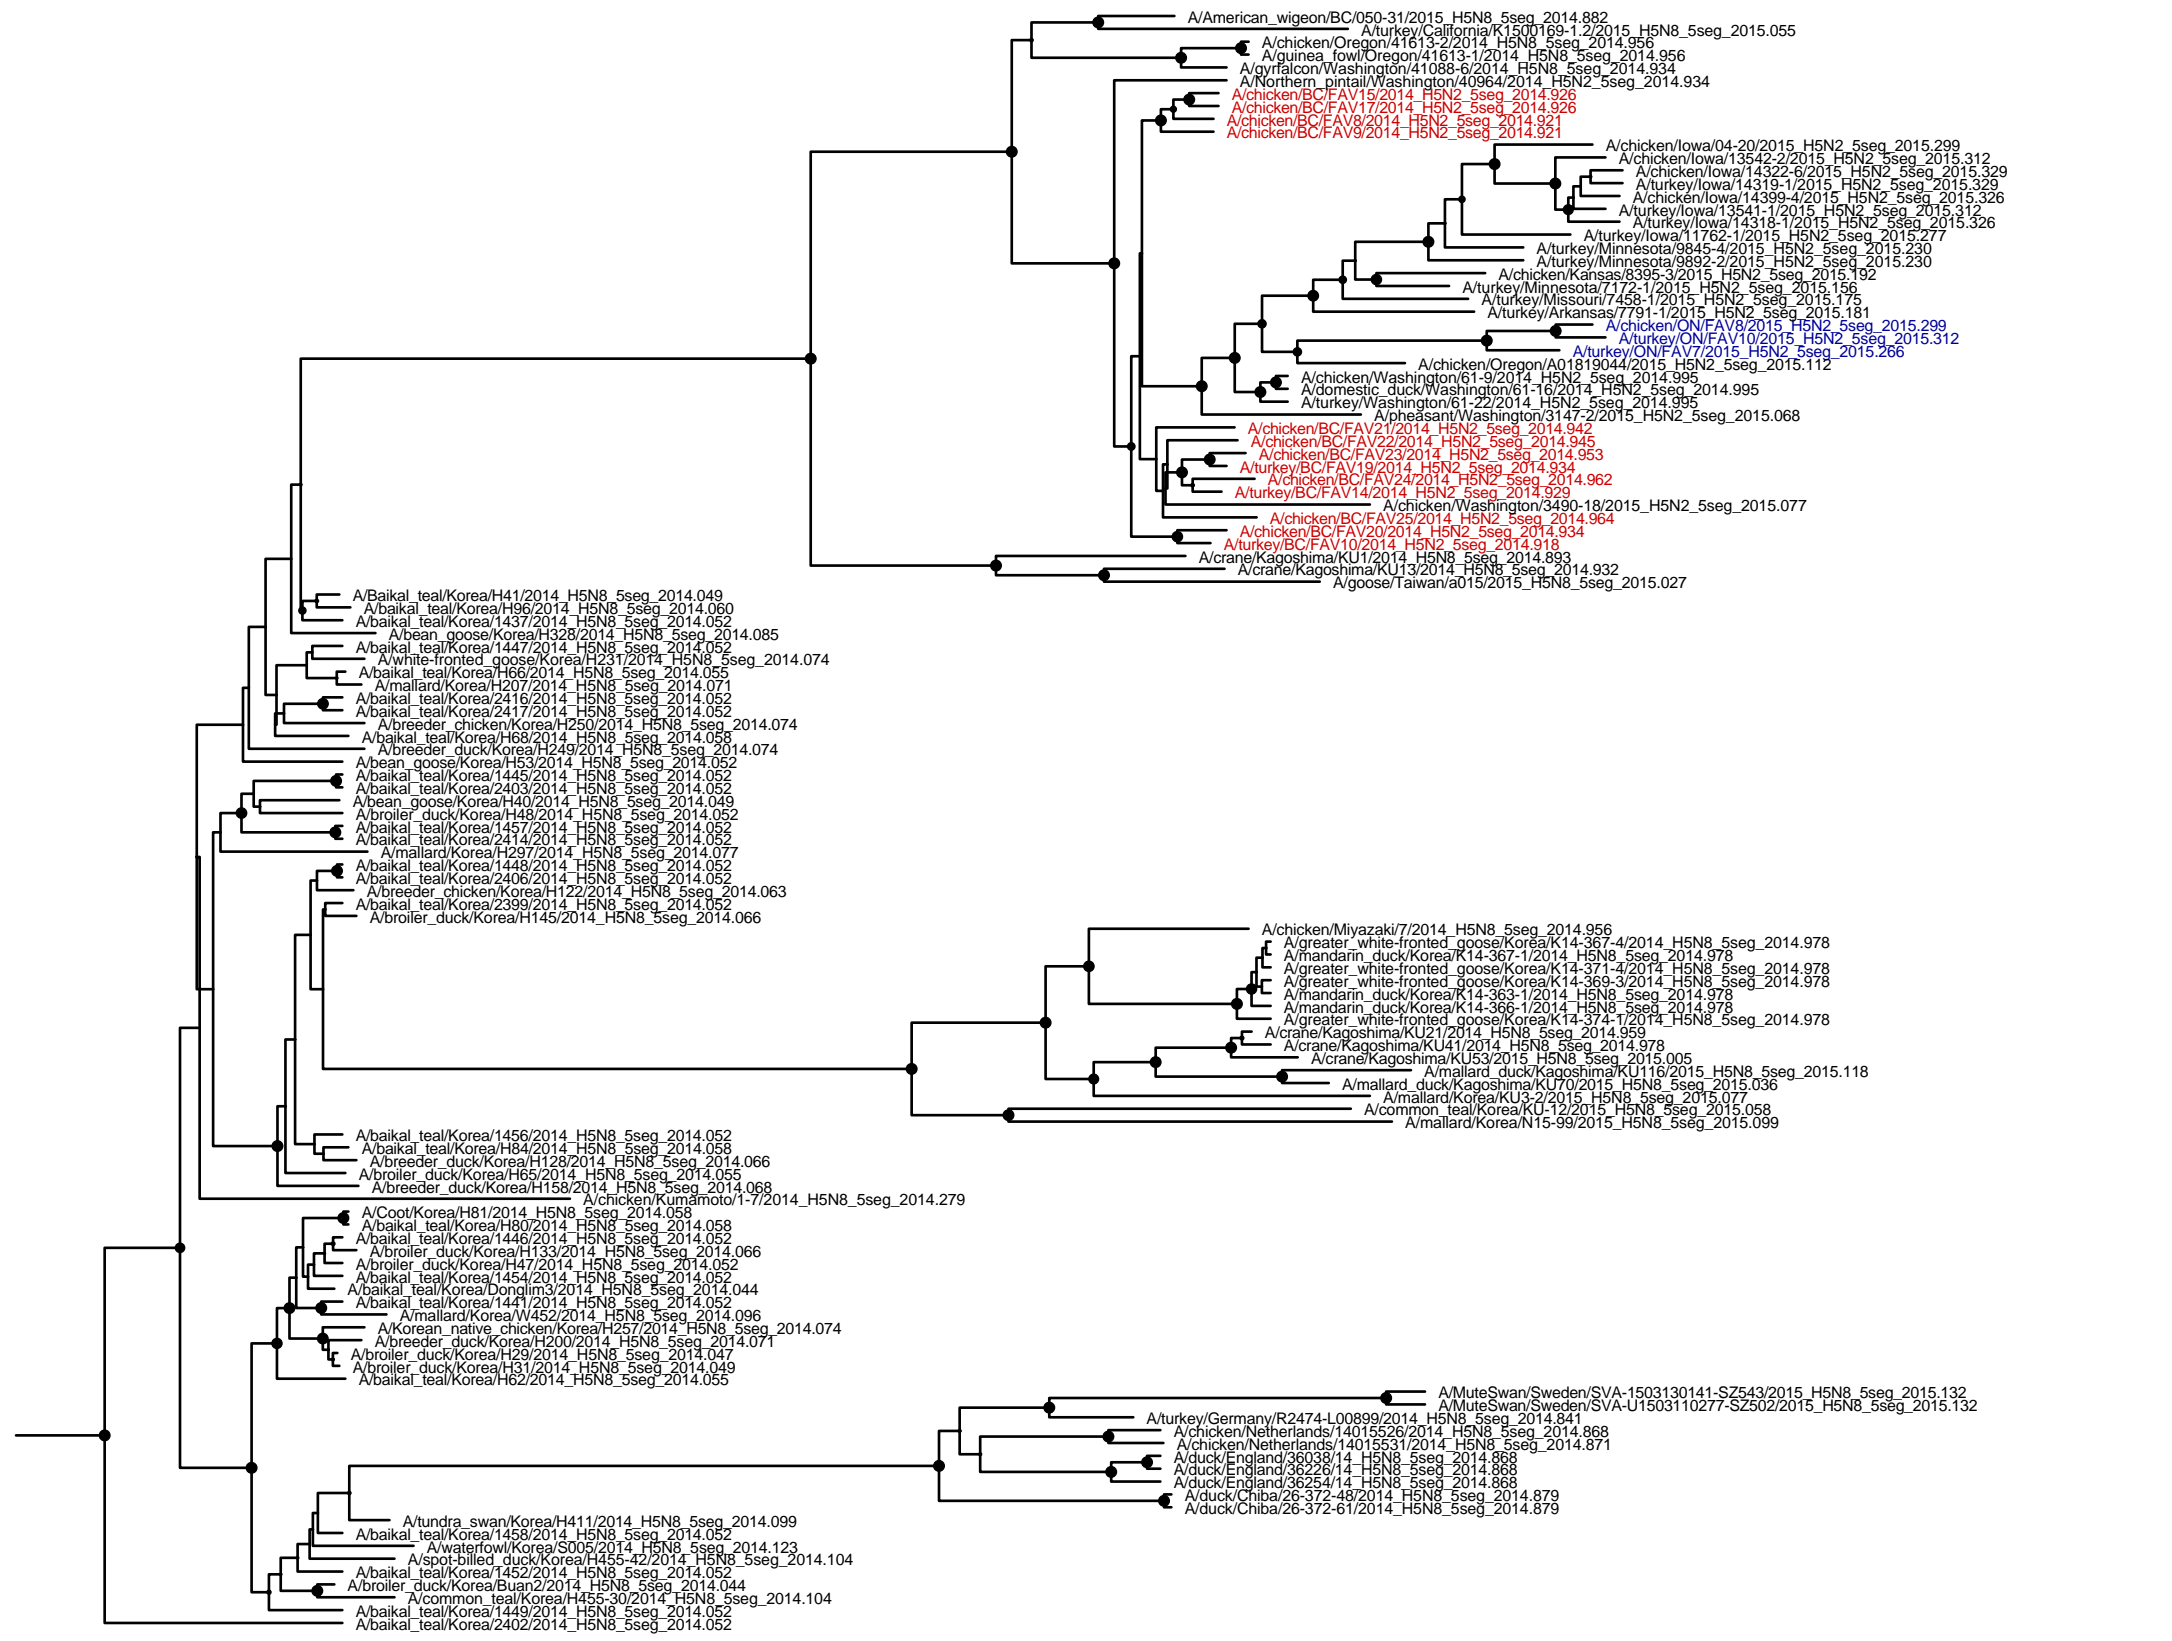

2014

2014.5

2015

2015.5

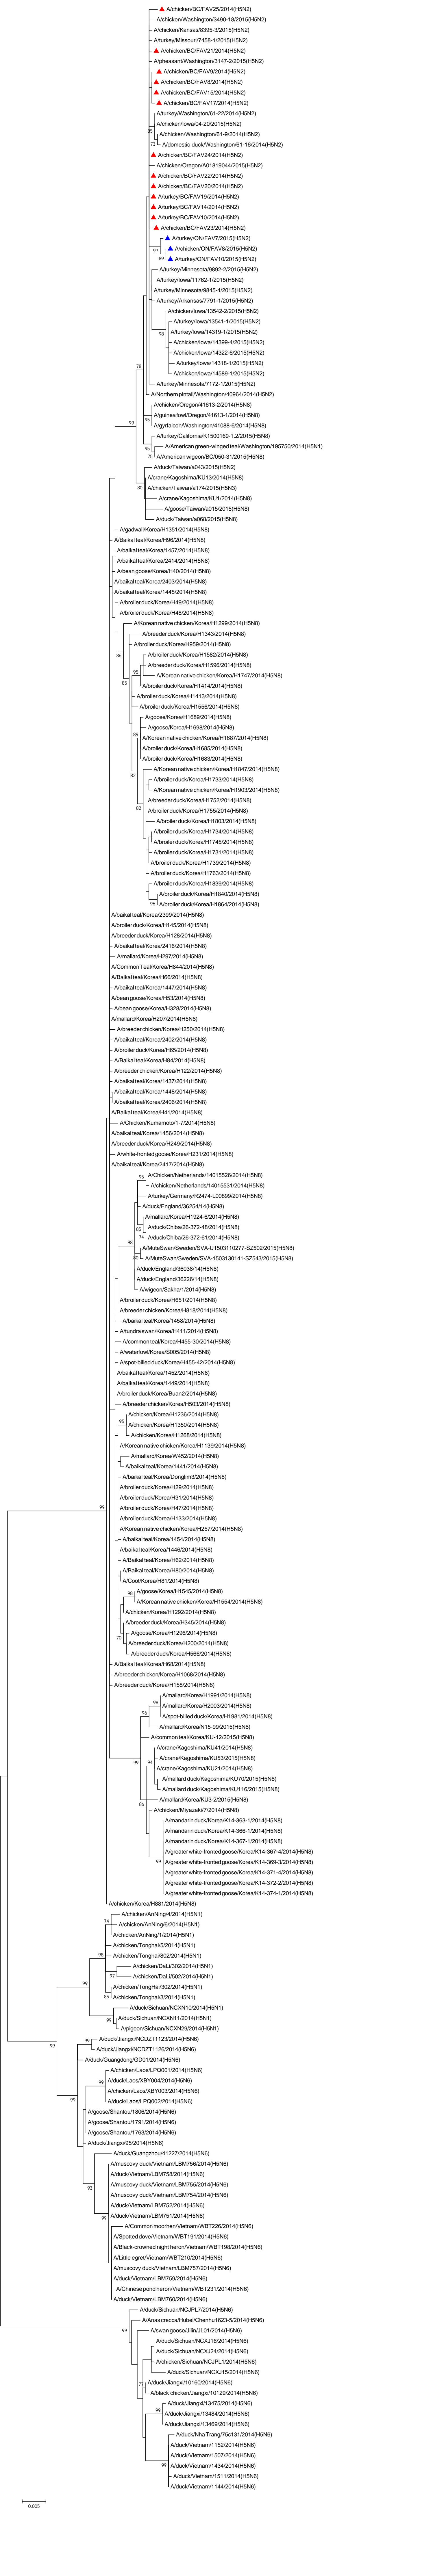

0.005



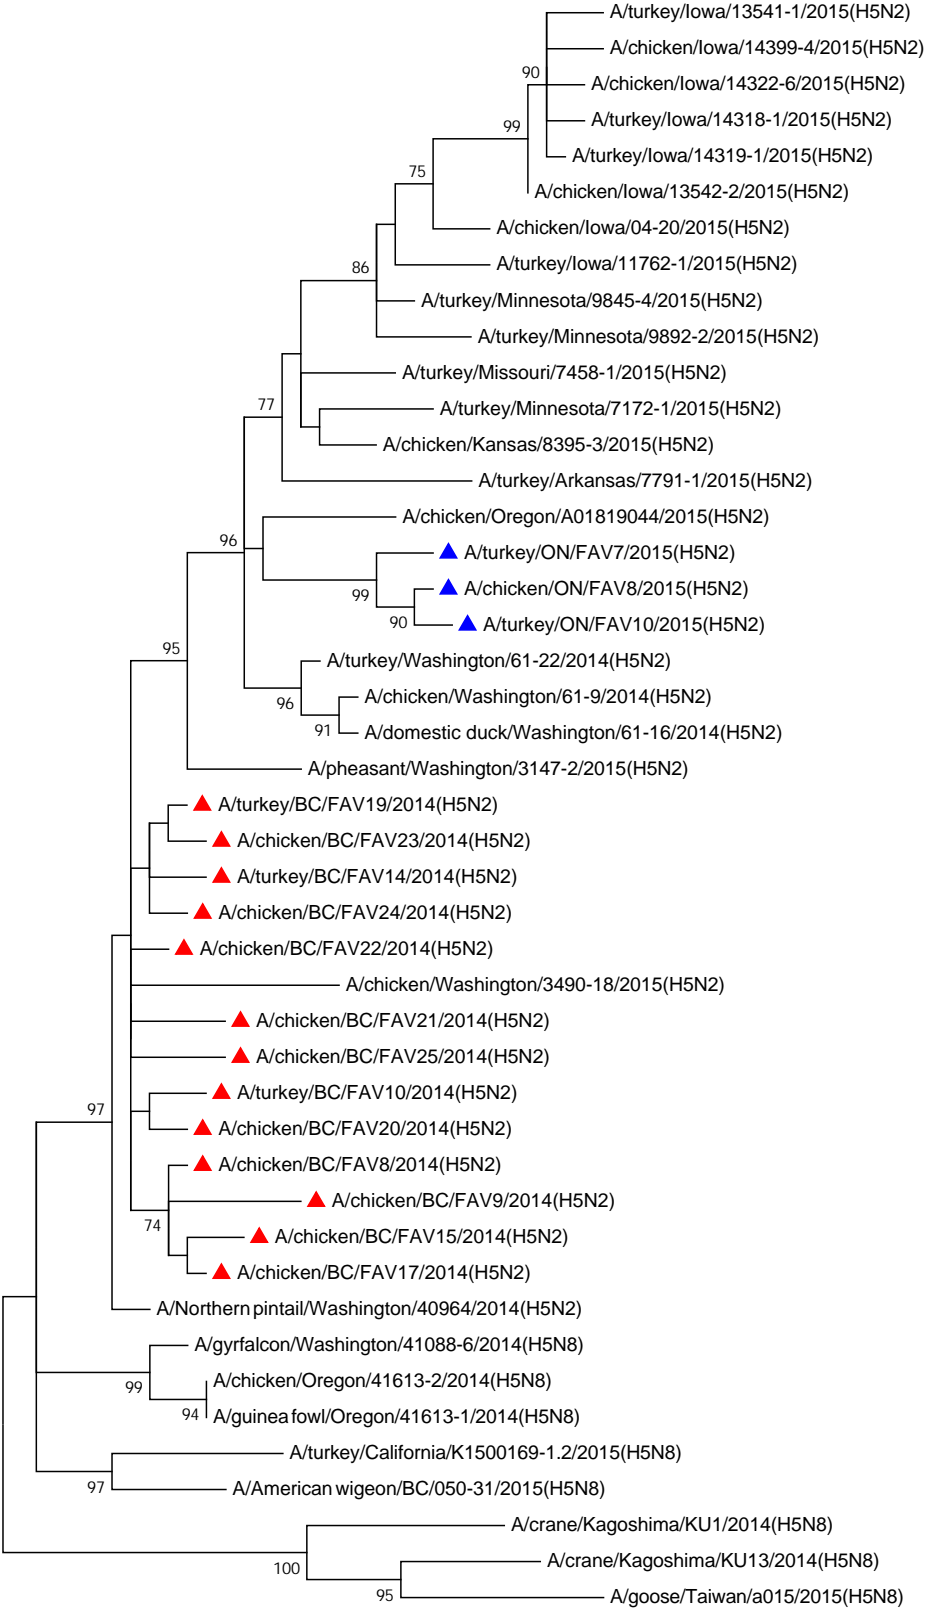

0.0005

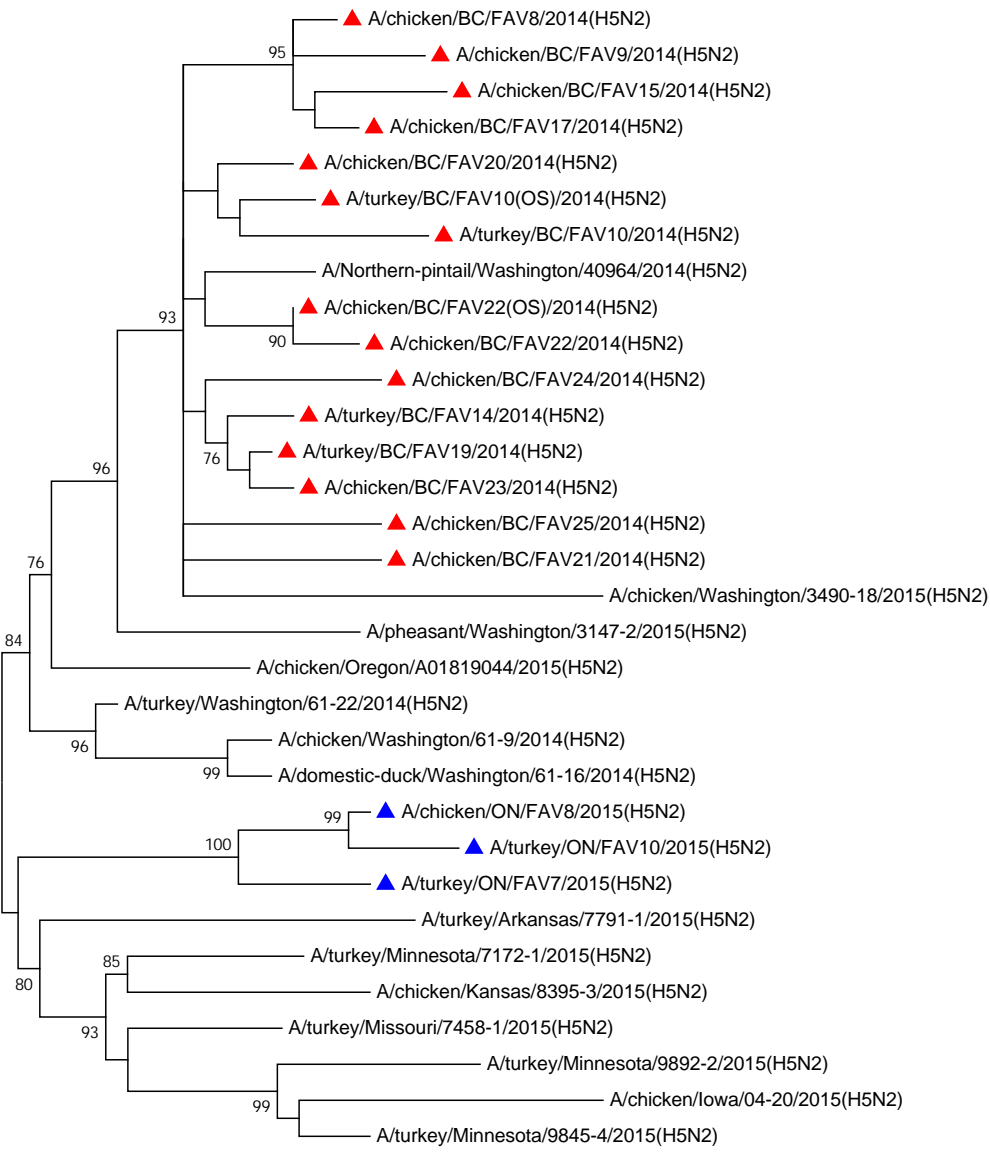

0.0002

**PART B1: INITIAL PREMISES VISIT REPORT - INITIAL ASSESSMENT AND SAMPLING**

**INVESTIGATION ID:** \_\_\_\_\_  
**Premises Identifier / Name:** \_\_\_\_\_

---

**B1.1** Date of arrival (YY/MM/DD): \_\_\_\_ / \_\_\_\_ / \_\_\_\_ Time of arrival (24 hr):

Licence plates of CFIA vehicles used for visit:

**B1.2** GPS coordinate of main entrance way: (units are decimal degrees, to 5 decimal places)

**LAT:** \_\_\_\_\_ **LONG:** -

**B1.3** Name and title of person(s) accompanying CFIA staff on the premises visit:

**B1.4** Provide a complete description of the location of this premises (i.e. street address, mailing address, legal land description, etc.):

**Confirm** contact numbers for the premises:

Phone:

Cellular:

Fax:

**B1.5** **Confirm** CONTACT PERSON for the premises:

**Address:**

Title(s):

**Confirm** contact numbers:

Phone:

Cellular:

Fax:

**B1.6** **Confirm** OWNER of the premises:

**Address:**

**Confirm** contact numbers for the OWNER of the premises:

Phone:

Cellular:

Fax:

**B1.7** **Confirm** OWNER(S) of the animals on site:

**Address:**

**Confirm** contact numbers for the OWNER(S) of the animals:

Phone:

Cellular:

Fax:



**PART B1: INITIAL PREMISES VISIT REPORT - INITIAL ASSESSMENT AND SAMPLING**

**INVESTIGATION ID:** \_\_\_\_\_  
**Premises Identifier / Name:** \_\_\_\_\_

**B1.8** List ANY OTHER PEOPLE connected to the animals on this premises in the table below:

| NAME | ADDRESS | PHONE | HOW ARE THEY CONNECTED? |
|------|---------|-------|-------------------------|
|      |         |       |                         |
|      |         |       |                         |
|      |         |       |                         |
|      |         |       |                         |
|      |         |       |                         |

**B1.9 ANIMAL PRODUCTION TYPE**

(1) How would you characterize this operation / premises? (Check ALL that are appropriate.)

- ARTIFICIAL INSEMINATION UNIT
- BREEDING - OUTDOOR RANGE
- COMMERCIAL - OUTDOOR RANGE
- COMMERCIAL - TOTAL CONFINEMENT BARN
- COMMERCIAL - SEMI-CONFINEMENT BARN
- EDUCATIONAL - SCHOOL
- EDUCATIONAL - ZOO, PUBLIC ACCESS
- EXHIBITION / FAIRGROUND / COMPETITION FACILITY
- HUNT PRESERVE - OUTDOOR RANGE
- HUNT PRESERVE - SUPPLIER
- LABORATORY / RESEARCH FACILITY
- NON-COMMERCIAL - OUTDOOR RANGE
- NON-COMMERCIAL - SEMI-CONFINEMENT BARN
- NON-COMMERCIAL - TOTAL CONFINEMENT BARN
- NUCLEUS OR MULTIPLIER BREEDER HERD
- PARENT / GRANDPARENT STOCK (AVIAN)
- PET STORE / SALES FACILITY
- PUREBRED - OUTDOOR RANGE
- PUREBRED - SEMI-CONFINEMENT BARN
- PUREBRED - TOTAL CONFINEMENT BARN
- QUARANTINE STATION / EXPORT ASSEMBLY
- VELVET PRODUCTION
- VETERINARY HOSPITAL / CLINIC
- OTHER - Describe:

(2) Is this premises part of a multi-site production unit? **YES** \_\_\_\_\_ / **NO** \_\_\_\_\_  
*If YES:* Please describe:

(3) This premises is a 'closed' production unit (i.e. 'all-in / all-out' by premises). **YES** \_\_\_\_\_ / **NO** \_\_\_\_\_  
*If NO:* Please describe:

**PART B1: INITIAL PREMISES VISIT REPORT - INITIAL ASSESSMENT AND SAMPLING**

**INVESTIGATION ID:** \_\_\_\_\_  
**Premises Identifier / Name:** \_\_\_\_\_

**B1.9 ANIMAL PRODUCTION TYPE (continued)**

(4) Check off ALL types of animals on this premises.  
 Identify which of these are the MAIN types (i.e. financial importance) to this operation.

| <b>AVIAN:</b>                                  | <b>Present on<br/>Premises?</b> | <b>Identify (✓) MAIN<br/>type(s)</b> |
|------------------------------------------------|---------------------------------|--------------------------------------|
| Chicken - meat type - broiler                  | <input type="checkbox"/>        | _____                                |
| Chicken - meat type - broiler breeder          | <input type="checkbox"/>        | _____                                |
| Chicken - meat type - broiler breeder pullets  | <input type="checkbox"/>        | _____                                |
| Chicken - meat type - broiler breeder roosters | <input type="checkbox"/>        | _____                                |
| Chicken - egg type - layer                     | <input type="checkbox"/>        | _____                                |
| Chicken - egg type - pullet                    | <input type="checkbox"/>        | _____                                |
| Chicken - egg type - breeder                   | <input type="checkbox"/>        | _____                                |
| Chicken - egg type - breeder pullets           | <input type="checkbox"/>        | _____                                |
| Chicken - dual purpose                         | <input type="checkbox"/>        | _____                                |
| Emu                                            | <input type="checkbox"/>        | _____                                |
| Gamebird - pheasant                            | <input type="checkbox"/>        | _____                                |
| Gamebird - quail                               | <input type="checkbox"/>        | _____                                |
| Gamebird - other: _____                        | <input type="checkbox"/>        | _____                                |
| Import - illegal - type: _____                 | <input type="checkbox"/>        | _____                                |
| Import - legal - type: _____                   | <input type="checkbox"/>        | _____                                |
| Ostrich                                        | <input type="checkbox"/>        | _____                                |
| Pigeon - racing                                | <input type="checkbox"/>        | _____                                |
| Pigeon - squab                                 | <input type="checkbox"/>        | _____                                |
| Raptor                                         | <input type="checkbox"/>        | _____                                |
| Rhea                                           | <input type="checkbox"/>        | _____                                |
| Specialty - type: _____                        | <input type="checkbox"/>        | _____                                |
| Specialty breeder - type: _____                | <input type="checkbox"/>        | _____                                |
| Tinamou                                        | <input type="checkbox"/>        | _____                                |
| Turkey - breeder                               | <input type="checkbox"/>        | _____                                |
| Turkey - meat                                  | <input type="checkbox"/>        | _____                                |
| Turkey - replacement breeder                   | <input type="checkbox"/>        | _____                                |
| Waterfowl - duck                               | <input type="checkbox"/>        | _____                                |
| Waterfowl - duck breeder                       | <input type="checkbox"/>        | _____                                |
| Waterfowl - goose                              | <input type="checkbox"/>        | _____                                |
| Waterfowl - goose breeder                      | <input type="checkbox"/>        | _____                                |
| Waterfowl - other domestic _____               | <input type="checkbox"/>        | _____                                |
| Waterfowl - wild                               | <input type="checkbox"/>        | _____                                |
| Wild bird - type: _____                        | <input type="checkbox"/>        | _____                                |
| Zoo bird - type: _____                         | <input type="checkbox"/>        | _____                                |

**PART B1: INITIAL PREMISES VISIT REPORT - INITIAL ASSESSMENT AND SAMPLING**

**INVESTIGATION ID:** \_\_\_\_\_  
**Premises Identifier / Name:** \_\_\_\_\_

**B1.9(4) ANIMAL TYPES (continued)**

| <b>BOVINE:</b>                                    | <b>Present on<br/>Premises?</b> | <b>Identify (✓) MAIN<br/>type(s)</b> |
|---------------------------------------------------|---------------------------------|--------------------------------------|
| Dairy - mature cows                               | <input type="checkbox"/>        | _____                                |
| Dairy - heifers                                   | <input type="checkbox"/>        | _____                                |
| Dairy - feeder calves (veal, steers)              | <input type="checkbox"/>        | _____                                |
| Dairy - bulls                                     | <input type="checkbox"/>        | _____                                |
| Beef - cow/calf                                   | <input type="checkbox"/>        | _____                                |
| Beef - backgrounder (on grass or growth ration)   | <input type="checkbox"/>        | _____                                |
| Beef - feeder - steers and/or heifers             | <input type="checkbox"/>        | _____                                |
| Beef - finishers - steers and/or heifers          | <input type="checkbox"/>        | _____                                |
| Beef - feeder / finisher - cull cows and/or bulls | <input type="checkbox"/>        | _____                                |
| Beef - bulls                                      | <input type="checkbox"/>        | _____                                |
| Farmed bison - breeders                           | <input type="checkbox"/>        | _____                                |
| Farmed bison - feeders                            | <input type="checkbox"/>        | _____                                |
| Wild bison                                        | <input type="checkbox"/>        | _____                                |
| Other _____                                       | <input type="checkbox"/>        | _____                                |

**SMALL RUMINANTS:**

|                                                      |                          |       |
|------------------------------------------------------|--------------------------|-------|
| Sheep - Breeding operation - ewes and lambs          | <input type="checkbox"/> | _____ |
| Sheep - Breeding and Feeder operation                | <input type="checkbox"/> | _____ |
| Sheep - Feeder operation only                        | <input type="checkbox"/> | _____ |
| Sheep - Wool production                              | <input type="checkbox"/> | _____ |
| Sheep - Milk production                              | <input type="checkbox"/> | _____ |
| Rams                                                 | <input type="checkbox"/> | _____ |
| Goats - Breeding operation - does and kids           | <input type="checkbox"/> | _____ |
| Goats - Breeding and Feeder operation                | <input type="checkbox"/> | _____ |
| Goats - Feeder operation only                        | <input type="checkbox"/> | _____ |
| Goats - Hair production                              | <input type="checkbox"/> | _____ |
| Goats - Milk production                              | <input type="checkbox"/> | _____ |
| Bucks                                                | <input type="checkbox"/> | _____ |
| Llama / vicuna / alpaca - Breeding - female and cria | <input type="checkbox"/> | _____ |
| Llama / vicuna / alpaca - Breeding & Feeding         | <input type="checkbox"/> | _____ |
| Llama / vicuna / alpaca - Feeder operation only      | <input type="checkbox"/> | _____ |
| Llama / vicuna / alpaca - Wool production            | <input type="checkbox"/> | _____ |
| Llama / vicuna / alpaca - Males                      | <input type="checkbox"/> | _____ |
| Wild small ruminants - hunt preserve                 | <input type="checkbox"/> | _____ |
| Other _____                                          | <input type="checkbox"/> | _____ |

**CERVIDS:**

|                                |                          |       |
|--------------------------------|--------------------------|-------|
| Captive white tailed deer      | <input type="checkbox"/> | _____ |
| Captive mule deer              | <input type="checkbox"/> | _____ |
| Captive fallow deer            | <input type="checkbox"/> | _____ |
| Captive red deer               | <input type="checkbox"/> | _____ |
| Captive reindeer / caribou     | <input type="checkbox"/> | _____ |
| Captive elk                    | <input type="checkbox"/> | _____ |
| Captive red deer / elk crosses | <input type="checkbox"/> | _____ |
| Other captive cervids _____    | <input type="checkbox"/> | _____ |

**PART B1: INITIAL PREMISES VISIT REPORT - INITIAL ASSESSMENT AND SAMPLING**

**INVESTIGATION ID:** \_\_\_\_\_  
**Premises Identifier / Name:** \_\_\_\_\_

**B1.9(4) ANIMAL TYPES (continued)**

| <b>EQUINE:</b>                                      | <b>Present on<br/>Premises?</b> | <b>Identify (✓) MAIN<br/>type(s)</b> |
|-----------------------------------------------------|---------------------------------|--------------------------------------|
| Horses - Breeding operation - mares and foals       | <input type="checkbox"/>        | _____                                |
| Horses - Stallions                                  | <input type="checkbox"/>        | _____                                |
| Horses - Standardbred Racing training facility      | <input type="checkbox"/>        | _____                                |
| Horses - Thoroughbred Racing training facility      | <input type="checkbox"/>        | _____                                |
| Horses - Quarter Horse Racing / Training facility   | <input type="checkbox"/>        | _____                                |
| Horses - Performance - endurance                    | <input type="checkbox"/>        | _____                                |
| Horses - Performance - dressage                     | <input type="checkbox"/>        | _____                                |
| Horses - Performance - rodeo                        | <input type="checkbox"/>        | _____                                |
| Horses - Performance - chuckwagon                   | <input type="checkbox"/>        | _____                                |
| Horses - Performance - other _____                  | <input type="checkbox"/>        | _____                                |
| Horses - Boarding facility (pleasure / performance) | <input type="checkbox"/>        | _____                                |
| Horses - Draft                                      | <input type="checkbox"/>        | _____                                |
| Horses - Miniature                                  | <input type="checkbox"/>        | _____                                |
| Donkeys                                             | <input type="checkbox"/>        | _____                                |
| Mules                                               | <input type="checkbox"/>        | _____                                |
| Equine - food animal production                     | <input type="checkbox"/>        | _____                                |
| Other _____                                         | <input type="checkbox"/>        | _____                                |
| <br>                                                |                                 |                                      |
| <b>SWINE:</b>                                       |                                 |                                      |
| Gilts and Sows - Open and/or Bred                   | <input type="checkbox"/>        | _____                                |
| Sows - Farrowing and Nursing                        | <input type="checkbox"/>        | _____                                |
| Piglets - Nursing                                   | <input type="checkbox"/>        | _____                                |
| Weaners                                             | <input type="checkbox"/>        | _____                                |
| Grower / Finisher                                   | <input type="checkbox"/>        | _____                                |
| Boars                                               | <input type="checkbox"/>        | _____                                |
| Farmed Wild Swine                                   | <input type="checkbox"/>        | _____                                |
| Wild Swine (hunt preserve)                          | <input type="checkbox"/>        | _____                                |
| Pets / Exotic species                               | <input type="checkbox"/>        | _____                                |
| Other - _____                                       | <input type="checkbox"/>        | _____                                |
| <br>                                                |                                 |                                      |
| <b>OTHER MAMMALS:</b>                               |                                 |                                      |
| Farmed mink                                         | <input type="checkbox"/>        | _____                                |
| Farmed foxes                                        | <input type="checkbox"/>        | _____                                |
| Farmed rabbits - fur                                | <input type="checkbox"/>        | _____                                |
| Farmed rabbits - meat                               | <input type="checkbox"/>        | _____                                |
| Farmed bees                                         | <input type="checkbox"/>        | _____                                |
| Other farmed animals _____                          | <input type="checkbox"/>        | _____                                |
| Other wild species _____                            | <input type="checkbox"/>        | _____                                |
| Dogs - pets                                         | <input type="checkbox"/>        | _____                                |
| Dogs - kennel / breeder                             | <input type="checkbox"/>        | _____                                |
| Cats - pets                                         | <input type="checkbox"/>        | _____                                |
| Cats - kennel / breeder                             | <input type="checkbox"/>        | _____                                |
| Other pet species _____                             | <input type="checkbox"/>        | _____                                |

**PART B1: INITIAL PREMISES VISIT REPORT - INITIAL ASSESSMENT AND SAMPLING**

**INVESTIGATION ID:** \_\_\_\_\_  
**Premises Identifier / Name:** \_\_\_\_\_

**B1.10 (1) SITE PLAN OF THE PREMISES**

**NOTE: Extra sheets are included at the end.**

|  |  |  |  |  |  |
|--|--|--|--|--|--|
|  |  |  |  |  |  |
|  |  |  |  |  |  |
|  |  |  |  |  |  |
|  |  |  |  |  |  |
|  |  |  |  |  |  |
|  |  |  |  |  |  |
|  |  |  |  |  |  |

Show **ALL** buildings on the premises.      Mark **NORTH** on the Site Plan.      **TAKE PHOTOGRAPHS!!!!**

**For those buildings which house animals:** Use the extra sheets to draw buildings that are multi-level, or that are partitioned off to hold different ages or categories of animals.

Draw yards and pasture areas that animals have access to, cropland, woodlots, entrance ways off public roads (mark GPS point with 'X'), roads, railways, streams, ponds, lakes, public right of way or footpath, or other significant features. (Use the MAP for locating these, if it is easier.)

Outline the perimeter of the property.      The size of the property is: \_\_\_\_\_ acres / hectares (select one)

Is there ANY STANDING WATER on the property?      **YES** \_\_\_\_\_ / **NO** \_\_\_\_\_

**If YES:** MARK this on the Site Plan.      **DONE** \_\_\_\_\_

Do waterfowl and / or wildlife visit this standing water?      **YES** \_\_\_\_\_ / **NO** \_\_\_\_\_

Locate WATER SOURCE on Site Plan; describe it (eg. well, municipal system):

Is the animals' drinking water / misting water treated (i.e. with chlorine)?      **YES** \_\_\_\_\_ / **NO** \_\_\_\_\_





**PART B1: INITIAL PREMISES VISIT REPORT - INITIAL ASSESSMENT AND SAMPLING**

**INVESTIGATION ID:** \_\_\_\_\_  
**Premises Identifier / Name:** \_\_\_\_\_

**B1.11 CLINICAL HISTORY OF THE PREMISES**

Identify the main person(s) responsible for the care of the animals:

**\*\*\* INTERVIEW THE ABOVE INDIVIDUAL(S) FOR THE FOLLOWING SECTION \*\*\***

Have you noticed ANY signs of illness / decreased production / increased mortality / ill health in ANY of the animals in the past 28 days? **YES** \_\_\_\_\_ / **NO** \_\_\_\_\_

**If YES:** What DATE did you first notice these signs of ill health? (YY/MM/DD) \_\_\_\_\_ / \_\_\_\_\_ / \_\_\_\_\_

Starting with the date above, provide a CLEAR HISTORY, in order, of the signs of ill health in the animals.

| Date observed |      | In what animals? |                                           |                                                                                    |                                                    |
|---------------|------|------------------|-------------------------------------------|------------------------------------------------------------------------------------|----------------------------------------------------|
| YY / MM / DD  | TYPE | AGE              | WHERE on the SITE PLAN were they located? | What signs of ill health were observed? Did these animals receive any treatments*? | WHERE on the SITE PLAN are they presently located? |
|               |      |                  |                                           |                                                                                    |                                                    |
|               |      |                  |                                           |                                                                                    |                                                    |
|               |      |                  |                                           |                                                                                    |                                                    |
|               |      |                  |                                           |                                                                                    |                                                    |
|               |      |                  |                                           |                                                                                    |                                                    |

\* Treatments include any preventative or therapeutic products administered to these animals.

**PART B1: INITIAL PREMISES VISIT REPORT - INITIAL ASSESSMENT AND SAMPLING**

INVESTIGATION ID: \_\_\_\_\_  
 Premises Identifier / Name: \_\_\_\_\_

**B1.12 INVENTORY OF ANIMALS ON THIS PREMISES AND RECORD OF DIAGNOSTIC SAMPLE COLLECTION**

List, describe thoroughly, and locate (based on the Site Plan of the Premises) ALL of the animals on this premises. (Use back of page if more space is required.) **Include comments on NON-FARMED animals also (i.e. feral cats / rodents / wildlife / wild birds / insects).**  
**NOTE: Treatments include both preventative (i.e. vaccines) and therapeutic agents administered to the animals.**

**PLEASE NOTE: IF NO RISK OF A REPORTABLE ANIMAL DISEASE IS IDENTIFIED, THEN NO SAMPLES NEED TO BE TAKEN!**

| Location on Site Plan | Animal Description: |     | Total here today | Initial Placement / Stocking Date (YY/MM/DD) | Total initially placed / stocked | Expected Movement / Slaughter Date (YY/MM/DD) | Are Clinical Signs Present? (Y/N)<br>Have these animals received any TREATMENTS? (Y/N)<br><i>If YES to either - Describe:</i> | Were samples taken? (Y/N) | If the animals were sampled: Record the IDENTIFICATION NUMBERS and TYPES of samples HERE |
|-----------------------|---------------------|-----|------------------|----------------------------------------------|----------------------------------|-----------------------------------------------|-------------------------------------------------------------------------------------------------------------------------------|---------------------------|------------------------------------------------------------------------------------------|
|                       | Type                | Age |                  |                                              |                                  |                                               |                                                                                                                               |                           |                                                                                          |
|                       |                     |     |                  |                                              |                                  |                                               |                                                                                                                               | Y / N                     |                                                                                          |
|                       |                     |     |                  |                                              |                                  |                                               |                                                                                                                               | Y / N                     |                                                                                          |
|                       |                     |     |                  |                                              |                                  |                                               |                                                                                                                               | Y / N                     |                                                                                          |
|                       |                     |     |                  |                                              |                                  |                                               |                                                                                                                               | Y / N                     |                                                                                          |
|                       |                     |     |                  |                                              |                                  |                                               |                                                                                                                               | Y / N                     |                                                                                          |

**TAKE PHOTOGRAPHS!!!!**



**PART B1: INITIAL PREMISES VISIT REPORT - INITIAL ASSESSMENT AND SAMPLING**

**INVESTIGATION ID:** \_\_\_\_\_  
**Premises Identifier / Name:** \_\_\_\_\_

**B1.14 EMPLOYEES OF THE PREMISES**

Provide complete contact information for all employees of the premises, if they live off site.  
 (Use back of page if more space is required.)

| Name, Address & Phone | Work schedule / duties | List and give details of ANY OTHER CONTACT with susceptible species, aside from the barns / enclosures on this premises. |
|-----------------------|------------------------|--------------------------------------------------------------------------------------------------------------------------|
|                       |                        |                                                                                                                          |
|                       |                        |                                                                                                                          |
|                       |                        |                                                                                                                          |
|                       |                        |                                                                                                                          |
|                       |                        |                                                                                                                          |
|                       |                        |                                                                                                                          |
|                       |                        |                                                                                                                          |
|                       |                        |                                                                                                                          |

## PART B1: INITIAL PREMISES VISIT REPORT - INITIAL ASSESSMENT AND SAMPLING

INVESTIGATION ID: \_\_\_\_\_  
Premises Identifier / Name: \_\_\_\_\_

**B1.15 RISK ASSESSMENT**

This premises MUST be considered as 'HIGH RISK' if any of the following statements is **TRUE**:

|                                                                                                                                                                                                                                                                                                             |       |
|-------------------------------------------------------------------------------------------------------------------------------------------------------------------------------------------------------------------------------------------------------------------------------------------------------------|-------|
| This premises was identified as a <b>SUSPECT INFECTED</b> premises based on history and necropsy findings by a Species Specialist and/or a Diagnostic Laboratory.                                                                                                                                           | T / F |
| This premises was identified as a <b>SUSPECT INFECTED</b> premises based on the identification of HIGH RISK animals during ante-mortem and/or post-mortem inspection by the Veterinarian-in-Charge at a registered establishment (abattoir), or the designated responsible person at a provincial abattoir. | T / F |
| This premises was identified as a <b>SUSPECT or PRESUMED INFECTED</b> premises based on the detection of the agent, or a serological response to the agent, by a non-CFIA Laboratory.                                                                                                                       | T / F |
| This premises was identified as a <b>SUSPECT or PRESUMED or CONFIRMED INFECTED</b> premises based on the detection of the agent, or a serological response to the agent, by a CFIA Laboratory.                                                                                                              | T / F |
| This premises is considered to be <b>SUSPECT INFECTED</b> because animals are clinically ill, with signs consistent with a reportable disease, as assessed by the investigating veterinarian(s).                                                                                                            | T / F |
| <b>FOLLOW UP INVESTIGATION:</b> This premises is a SIGNIFICANT Contact to a High Risk <b>SUSPECT or PRESUMED or CONFIRMED INFECTED</b> Premises (e.g. TRACE-IN, TRACE-OUT).                                                                                                                                 | T / F |
| <b>FOLLOW UP INVESTIGATION:</b> This premises is located within 1 kilometre of a High Risk <b>SUSPECT or PRESUMED or CONFIRMED INFECTED</b> Premises.                                                                                                                                                       | T / F |
| <b>FOLLOW UP INVESTIGATION:</b> This premises is located within 1 to 3 kilometres of a High Risk <b>SUSPECT or PRESUMED or CONFIRMED INFECTED</b> Premises.                                                                                                                                                 | T / F |
| <b>FOLLOW UP INVESTIGATION:</b> This premises is located within 3 to 5 kilometres of a High Risk <b>SUSPECT or PRESUMED or CONFIRMED INFECTED</b> Premises.                                                                                                                                                 | T / F |

**IF NONE OF THE ABOVE ARE 'TRUE':**

This premises SHOULD be considered as 'HIGH RISK' if **SEVERAL** of the following statements are **TRUE**:

|                                                                                                                                                       |       |
|-------------------------------------------------------------------------------------------------------------------------------------------------------|-------|
| There are <b>domestic</b> waterfowl maintained on the premises.                                                                                       | T / F |
| There is evidence / history of subnormal health in any barn / group of animals on the premises. <b>(B1.11)</b>                                        | T / F |
| Some animals have access to the outdoors.                                                                                                             | T / F |
| There has been evidence of wildlife or wild birds on or around this premises over the past 90 days.                                                   | T / F |
| Wild life and/or wild birds are able to enter the barns.                                                                                              | T / F |
| The animals on this premises may have direct contact with animals from other premises (i.e. communal pasture) and/or with wild species.               | T / F |
| This premises is part of a multi-site production system <b>(B1.9)</b> .                                                                               | T / F |
| This premises is NOT a closed production unit <b>(B1.9)</b> .                                                                                         | T / F |
| This premises is at a HIGH RISK of becoming infected due to many movements onto / off of it.                                                          | T / F |
| Access to the barns is not restricted.                                                                                                                | T / F |
| Outside footwear is worn inside the barns.                                                                                                            | T / F |
| Residents and/or employees have contact with susceptible species elsewhere <b>(B1.13, B1.14)</b> .                                                    | T / F |
| Water used for the animals (eg. drinking, misting) is not treated <b>(B1.10(1))</b> .                                                                 | T / F |
| There is a history of foreign travel and/or products from foreign countries being brought on-site.                                                    | T / F |
| Record <b>any other Risk Factors</b> for this Disease that you have identified:<br>(Use back of page if necessary; attach Disease Specific Checklist) | T / F |

**PART B1: INITIAL PREMISES VISIT REPORT - INITIAL ASSESSMENT AND SAMPLING**

**INVESTIGATION ID:** \_\_\_\_\_  
**Premises Identifier / Name:** \_\_\_\_\_

**B1.16 RISK CATEGORY DECISION**

This premises is being assessed as:

- HIGH RISK**
- MEDIUM**
- LOW RISK**
- NO RISK**

**B1.17 CONTROL OF THE PREMISES**

Are CFIA controls being put in place on this premises? **YES** \_\_\_\_\_ / **NO** \_\_\_\_\_

**If YES:** Identify ALL reasons WHY the controls are being put in place:

- The premises is HIGH RISK.
- This is a Follow-up Investigation from a High Risk Suspect Premises.
- OTHER - Describe:

Record details on all Operational Activities that may be impacted by the Movement Controls.  
 (For example: products and / or animals going to market, replacement animals being brought in or moved out, within premises' movements.)

| Operational Activity | Expected Movement Schedule |
|----------------------|----------------------------|
|                      |                            |
|                      |                            |
|                      |                            |
|                      |                            |
|                      |                            |



**PART B1: INITIAL PREMISES VISIT REPORT - INITIAL ASSESSMENT AND SAMPLING**

**INVESTIGATION ID:** \_\_\_\_\_  
**Premises Identifier / Name:** \_\_\_\_\_

**B1.18 ACTIONS BASED ON RISK CATEGORY**

**(1) If NO RISK: END VISIT HERE... RETURN TO OFFICE; COMPLETE DATA ENTRY**

**(2) If LOW RISK:** Samples to be submitted to:

NON-CFIA Laboratory Laboratory Name / Location: \_\_\_\_\_  
 Submission #: \_\_\_\_\_

**OR**

CFIA Laboratory Laboratory Name / Location: \_\_\_\_\_  
 LSTS Submission #: \_\_\_\_\_

**> > > Did you contact the CFIA Laboratory? YES \_\_\_\_\_ / NO \_\_\_\_\_**

Controls (eg. signs) set up at entranceway, if required.

**END VISIT HERE... RETURN TO OFFICE; COMPLETE DATA ENTRY & SAMPLE SUBMISSION.**

**(3) If HIGH or MEDIUM RISK:**

Samples to be submitted to:

NON-CFIA Laboratory Laboratory Name / Location: \_\_\_\_\_  
 Submission #: \_\_\_\_\_

**AND / OR**

CFIA Laboratory Laboratory Name / Location: \_\_\_\_\_  
 LSTS Submission #: \_\_\_\_\_

**> > > Did you contact the CFIA Laboratory? YES \_\_\_\_\_ / NO \_\_\_\_\_**

Establish the Time Period for The Trace Investigations (B2.3) **NOT APPLICABLE** \_\_\_\_\_

The Critical Period (CP) for introduction of this disease is set at: \_\_\_\_\_ days.

Using this CP, counting back from the date of the **first evidence of disease\***,  
 the starting date for the Tracing Period is: \_\_\_\_ / \_\_\_\_ / \_\_\_\_ (YY/MM/DD).

**\* If required, consult with your Area Disease Specialist to determine this.**

Add the above date to Sections B2.3 of Part B2 of the Investigation Questionnaire.

Controls (eg. signs) set up at entranceway

Call in Report of '**HIGH RISK**' to Area Disease Specialist and Inspection Manager.

If required, ensure contact to the local Public Health Office is made.  Handout provided  Called

Sign off on this Part (B1) of the questionnaire. If possible, make a copy of Part B1 to keep as a reference while filling out Part B2. Give the original Part B1, the samples and any used cameras to the Inspector to take back to District Office for data entry and sample submission. (NOTE: If there will be a long delay due to travel, consider either calling in, or faxing in the Part B1 information to Support Staff at the District Office for more rapid data entry into CEMRS.)

Stay on farm (with phone and cameras) and complete Part B2 of the Investigation Questionnaire.

**CONTACTS (Name & Telephone Number):**

Veterinarian on site: \_\_\_\_\_  
 Inspector at gate: \_\_\_\_\_  
 Area Disease Specialist: \_\_\_\_\_  
 Inspection Manager: \_\_\_\_\_  
 Support Staff at District Office: \_\_\_\_\_
